# Supplementary material
Source: HighWire-hosted journal article supplement (http://www.cmaj.ca/highwire/filestream/80273/field_highwire_adjunct_files/5/210053-res-6-at.pdf)
Supplement: 210053-res-6-at.pdf [file 210053-res-6-at.pdf]

## Appendix 6

**Supplementary Table S3. Chronic comorbid conditions among children with COVID-19 related versus non-COVID-19 related hospitalizations.**

| Characteristics, n (% <sup>1</sup> )                            | Reason for admission          |                      | p-value |
|-----------------------------------------------------------------|-------------------------------|----------------------|---------|
|                                                                 | COVID-19 related <sup>2</sup> | Not COVID-19 related |         |
| <b>Number of admissions, N</b>                                  | 150                           | 110                  | ---     |
| <b>Born prematurely (&lt;37 weeks)<sup>3</sup></b>              | 9–12 (6.5–8.6)                | 17 (18.7)            | 0.03    |
| <b>Any comorbid condition</b>                                   | 62 (41.3)                     | 40 (36.4)            | 0.4     |
| Chronic encephalopathy with severe neurodisability <sup>4</sup> | 11–14 (7.3–9.3)               | 6 (5.5)              | 0.5     |
| Obesity                                                         | 11–14 (7.3–9.3)               | <5 (<4.5)            | 0.1     |
| Asthma                                                          | 10–13 (6.7–8.7)               | <5 (<4.5)            | 0.03    |
| Chronic lung disease (excluding asthma)                         | 10–13 (6.7–8.7)               | <5 (<4.5)            | 0.3     |
| Epilepsy                                                        | 10–13 (6.7–8.7)               | 5 (4.5)              | 0.4     |
| Gastrointestinal or liver disease                               | 8–11 (5.3–7.3)                | 5 (4.5)              | 0.6     |
| Neurodevelopmental disorders <sup>4</sup>                       | 7–10 (4.7–6.7)                | 8 (7.3)              | 0.8     |
| Immunosuppression                                               | 5–8 (3.3–5.3)                 | 7 (6.4)              | 0.7     |
| Sickle cell/other hematologic condition                         | 5–8 (3.3–5.3)                 | <5 (<4.5)            | 0.2     |
| Metabolic disease                                               | 6 (4.0)                       | 0 (0.0)              | 0.04    |
| Other neurologic condition <sup>4</sup>                         | 5 (3.3)                       | <5 (<4.5)            | 1.0     |
| Chronic renal disease                                           | <5 (<3.3)                     | <5 (<4.5)            | 0.7     |
| Congenital heart disease                                        | <5 (<3.3)                     | <5 (<4.5)            | 0.7     |
| Diabetes                                                        | <5 (<3.3)                     | 5 (4.5)              | 0.1     |
| Malignancy                                                      | <5 (<3.3)                     | <5 (<4.5)            | 1.0     |
| Other congenital anomalies                                      | <5 (<3.3)                     | <5 (<4.5)            | 0.2     |
| Solid organ transplant                                          | <5 (<3.3)                     | 0 (0.0)              | 1.0     |
| Tracheostomy                                                    | <5 (<3.3)                     | 0 (0.0)              | 1.0     |
| Psychiatric condition                                           | 0 (0.0)                       | 5 (4.5)              | 0.01    |
| Inflammatory bowel disease                                      | 0 (0.0)                       | <5 (<4.5)            | 0.2     |
| Bone marrow transplant                                          | 0 (0.0)                       | 0 (0.0)              | ---     |

<sup>1</sup>Denominators include cases with missing/unknown responses. For all conditions, the proportions of missing/unknown values was <5%.

<sup>2</sup>Some statistics are presented as ranges to prevent back-calculation of cells in conjunction with Table 3.

<sup>3</sup>Prematurity status was known for 139 COVID-19 admissions and 91 non-COVID-19 admissions.

<sup>4</sup>Chronic encephalopathy with severe neurodisability includes conditions causing significant motor (i.e. Palisano's gross motor function classification system 5) and cognitive impairments. Neurodevelopmental disorders include conditions such as ADHD, autism spectrum disorder, and trisomy 21. Other neurologic conditions were not otherwise categorized as chronic encephalopathy, metabolic, neurodevelopmental, or psychiatric.
